# Supplementary material for: Optimization of diformylfuran production from 5-hydroxymethylfurfural via catalytic oxidation in a packed-bed continuous flow reactor
Source: Royal Society of Chemistry journal article supplement (doi:10.1039/d4ra05816j), 2024-01-01
Supplement: d4ra05816j1.pdf [file d4ra05816j1.pdf]

**Effect of types of catalyst. Reaction conditions: 120 °C, 5-HMF solution (5 g/L) flow rate of 0.06 ml/min, acetonitrile as solvent, oxygen gas flow rate of 10 ml/min and catalyst amount of 0.05 g.**

Ru/Al<sub>2</sub>O<sub>3</sub> 120C/100psi/0.06flow/0.05cat/1002/ACE

|   | Vol.AQ | 5-HMF g   | HMFCA g | DFF g     | FFCA g    | FDCA g | Yield HMFCA | Yield DFF | Yield FFCA | Yield FDCA | Conversion | Selectivity | Carbon balance |
|---|--------|-----------|---------|-----------|-----------|--------|-------------|-----------|------------|------------|------------|-------------|----------------|
| 1 | 1.8    | 0.001194  | 0       | 0.0063266 | 0.0007067 | 0      | 0.00        | 56.81     | 7.07       | 0.00       | 86.73      | 65.50       | 78.03          |
| 2 | 1.8    | 0.0016345 | 0       | 0.0061622 | 0.0009367 | 0      | 0.00        | 55.33     | 9.37       | 0.00       | 81.84      | 67.61       | 78.71          |

Ru/C 120C/100psi/0.06flow/0.05cat/1002/ACE

|   | Vol.AQ | 5-HMF g   | HMFCA g | DFF g     | FFCA g    | FDCA g      | Yield HMFCA | Yield DFF | Yield FFCA | Yield FDCA | Conversion | Selectivity | Carbon balance |
|---|--------|-----------|---------|-----------|-----------|-------------|-------------|-----------|------------|------------|------------|-------------|----------------|
| 1 | 1.8    | 0.003519  | 0       | 0.0044546 | 0.0002002 | 7.72926E-06 | 0.00        | 40.00     | 2.00       | 0.07       | 60.90      | 65.68       | 51.45          |
| 2 | 1.8    | 0.0035431 | 0       | 0.004251  | 0.0001889 | 6.75435E-06 | 0.00        | 38.17     | 1.89       | 0.06       | 60.63      | 62.96       | 49.05          |

Pt/C 120C/100psi/0.06flow/0.05cat/1002/ACE

|   | Vol.AQ | 5-HMF g   | HMFCA g | DFF g     | FFCA g    | FDCA g | Yield HMFCA | Yield DFF | Yield FFCA | Yield FDCA | Conversion | Selectivity | Carbon balance |
|---|--------|-----------|---------|-----------|-----------|--------|-------------|-----------|------------|------------|------------|-------------|----------------|
| 1 | 1.8    | 0.0063854 | 0       | 0.0002514 | 1.834E-05 | 0      | 0.00        | 2.26      | 0.18       | 0.00       | 29.05      | 7.77        | 2.36           |
| 2 | 1.8    | 0.0064827 | 0       | 0.0002203 | 1.349E-05 | 0      | 0.00        | 1.98      | 0.13       | 0.00       | 27.97      | 7.07        | 1.95           |

**Effect of solvent. Reaction conditions: 120 °C, 5-HMF solution (5 g/L) flow rate of 0.06 ml/min, oxygen gas flow rate of 10 ml/min and Ru/Al<sub>2</sub>O<sub>3</sub> 0.05 g.**

**Acetonitrile** 120C/100psi/0.06flow/0.05cat/1002/ACE

|   | Vol.AQ | 5-HMF g   | HMFCa g | DFF g     | FFCA g    | FDCA g      | Yield HMFCa | Yield DFF | Yield FFCA | Yield FDCA | Conversion | Selectivity | Carbon balance |
|---|--------|-----------|---------|-----------|-----------|-------------|-------------|-----------|------------|------------|------------|-------------|----------------|
| 1 | 1.8    | 0.0025316 | 0       | 0.0060926 | 0.0007232 | 1.50984E-05 | 0.00        | 54.71     | 7.24       | 0.14       | 71.87      | 76.12       | 75.65          |
| 2 | 1.8    | 0.0028098 | 0       | 0.0058677 | 0.0005836 | 1.50726E-05 | 0.00        | 52.69     | 5.84       | 0.14       | 68.78      | 76.61       | 71.57          |

**Toluene** 120C/100psi/0.06flow/0.05cat/1002/TOL

|   | Vol.AQ | 5-HMF g   | HMFCa g | DFF g     | FFCA g | FDCA g | Yield HMFCa | Yield DFF | Yield FFCA | Yield FDCA | Conversion | Selectivity | Carbon balance |
|---|--------|-----------|---------|-----------|--------|--------|-------------|-----------|------------|------------|------------|-------------|----------------|
| 1 | 1.8    | 0.0024798 | 0       | 0.0061118 | 0      | 0      | 0.00        | 54.88     | 0.00       | 0.00       | 72.45      | 75.76       | 67.66          |
| 2 | 1.8    | 0.0022645 | 0       | 0.0056845 | 0      | 0      | 0.00        | 51.05     | 0.00       | 0.00       | 74.84      | 68.21       | 62.94          |

**Water** 120C/100psi/0.06flow/0.05cat/1002/water

|   | Vol.AQ | 5-HMF g   | HMFCa g | DFF g     | FFCA g    | FDCA g      | Yield HMFCa | Yield DFF | Yield FFCA | Yield FDCA | Conversion | Selectivity | Carbon balance |
|---|--------|-----------|---------|-----------|-----------|-------------|-------------|-----------|------------|------------|------------|-------------|----------------|
| 1 | 1.8    | 0.0044818 | 0       | 0.002294  | 0.0010744 | 5.63446E-05 | 0.00        | 20.60     | 10.75      | 0.51       | 50.20      | 41.03       | 37.60          |
| 2 | 1.8    | 0.0043382 | 0       | 0.0021826 | 0.000981  | 7.84217E-05 | 0.00        | 19.60     | 9.82       | 0.70       | 51.80      | 37.84       | 35.59          |

**DMSO** 120C/100psi/0.06flow/0.05cat/1002/DMSO

|   | Vol.AQ | 5-HMF g   | HMFCa g | DFF g     | FFCA g    | FDCA g | Yield HMFCa | Yield DFF | Yield FFCA | Yield FDCA | Conversion | Selectivity | Carbon balance |
|---|--------|-----------|---------|-----------|-----------|--------|-------------|-----------|------------|------------|------------|-------------|----------------|
| 1 | 1.8    | 0.0055942 | 0       | 0.0015758 | 0.0001404 | 0      | 0.00        | 14.15     | 1.41       | 0.00       | 37.84      | 37.39       | 18.51          |
| 2 | 1.8    | 0.0057815 | 0       | 0.0015102 | 0.0001284 | 0      | 0.00        | 13.56     | 1.28       | 0.00       | 35.76      | 37.92       | 17.63          |

## Box-Behnken design approach for optimization of DFF production

| StdOrder | RunOrder | PtType | Blocks | Temp | Oxy | Cat  | yield  | conversion | selectivity |
|----------|----------|--------|--------|------|-----|------|--------|------------|-------------|
| 1        | 1        | 2      | 1      | 100  | 10  | 0.1  | 46.490 | 89.505     | 51.941      |
| 2        | 2        | 2      | 1      | 140  | 10  | 0.1  | 71.700 | 97.043     | 73.884      |
| 3        | 3        | 2      | 1      | 100  | 30  | 0.1  | 55.810 | 88.478     | 63.077      |
| 4        | 4        | 2      | 1      | 140  | 30  | 0.1  | 69.850 | 93.467     | 74.732      |
| 5        | 5        | 2      | 1      | 100  | 20  | 0.05 | 43.310 | 67.865     | 63.818      |
| 6        | 6        | 2      | 1      | 140  | 20  | 0.05 | 65.710 | 92.774     | 70.828      |
| 7        | 7        | 2      | 1      | 100  | 20  | 0.15 | 54.110 | 96.586     | 56.023      |
| 8        | 8        | 2      | 1      | 140  | 20  | 0.15 | 81.750 | 99.865     | 81.860      |
| 9        | 9        | 2      | 1      | 120  | 10  | 0.05 | 53.490 | 69.426     | 77.046      |
| 10       | 10       | 2      | 1      | 120  | 30  | 0.05 | 62.690 | 77.033     | 81.381      |
| 11       | 11       | 2      | 1      | 120  | 10  | 0.15 | 66.970 | 99.426     | 67.357      |
| 12       | 12       | 2      | 1      | 120  | 30  | 0.15 | 65.610 | 99.163     | 66.164      |
| 13       | 13       | 0      | 1      | 120  | 20  | 0.1  | 58.770 | 98.046     | 59.941      |
| 14       | 14       | 0      | 1      | 120  | 20  | 0.1  | 58.910 | 97.324     | 60.530      |
| 15       | 15       | 0      | 1      | 120  | 20  | 0.1  | 58.550 | 98.235     | 59.602      |
| 16       | 16       | 2      | 2      | 100  | 10  | 0.1  | 44.295 | 93.562     | 47.343      |
| 17       | 17       | 2      | 2      | 140  | 10  | 0.1  | 72.715 | 99.806     | 72.857      |
| 18       | 18       | 2      | 2      | 100  | 30  | 0.1  | 55.984 | 87.741     | 63.806      |
| 19       | 19       | 2      | 2      | 140  | 30  | 0.1  | 69.275 | 99.391     | 69.699      |
| 20       | 20       | 2      | 2      | 100  | 20  | 0.05 | 44.591 | 69.774     | 63.907      |
| 21       | 21       | 2      | 2      | 140  | 20  | 0.05 | 62.473 | 94.952     | 65.794      |
| 22       | 22       | 2      | 2      | 100  | 20  | 0.15 | 56.927 | 90.544     | 62.873      |
| 23       | 23       | 2      | 2      | 140  | 20  | 0.15 | 83.436 | 99.264     | 84.055      |
| 24       | 24       | 2      | 2      | 120  | 10  | 0.05 | 51.756 | 63.506     | 81.498      |

|    |    |   |   |     |    |      |        |        |        |
|----|----|---|---|-----|----|------|--------|--------|--------|
| 25 | 25 | 2 | 2 | 120 | 30 | 0.05 | 61.473 | 76.711 | 80.135 |
| 26 | 26 | 2 | 2 | 120 | 10 | 0.15 | 66.747 | 97.688 | 68.326 |
| 27 | 27 | 2 | 2 | 120 | 30 | 0.15 | 65.241 | 99.678 | 65.452 |
| 28 | 28 | 0 | 2 | 120 | 20 | 0.1  | 58.519 | 98.742 | 59.264 |
| 29 | 29 | 0 | 2 | 120 | 20 | 0.1  | 58.227 | 92.516 | 62.937 |
| 30 | 30 | 0 | 2 | 120 | 20 | 0.1  | 58.545 | 96.435 | 60.709 |

Reaction performance of DFF synthesis over Ru/Al<sub>2</sub>O<sub>3</sub> catalyst for extended period.

| Hour | Vol.AQ | 5-HMF g  | HMFCA g | DFF g    | FFCA g | FDCA g | Yield HMFCA | Yield DFF | Yield FFCA | Yield FDCA | Conversion | Selectivity |
|------|--------|----------|---------|----------|--------|--------|-------------|-----------|------------|------------|------------|-------------|
| 2    | 1.8    | 0.000635 | 0       | 0.023589 | 0      | 0      | 0.00        | 84.06     | 0.00       | 0.00       | 97.20      | 86.48       |
| 4    | 1.8    | 0.000534 | 0       | 0.024327 | 0      | 0      | 0.00        | 86.68     | 0.00       | 0.00       | 97.65      | 88.77       |
| 6    | 1.8    | 0.000266 | 0       | 0.024495 | 0      | 0      | 0.00        | 87.28     | 0.00       | 0.00       | 98.83      | 88.32       |
| 8    | 1.8    | 0.000317 | 0       | 0.024053 | 0      | 0      | 0.00        | 85.71     | 0.00       | 0.00       | 98.60      | 86.92       |
| 10   | 1.8    | 0.000292 | 0       | 0.023887 | 0      | 0      | 0.00        | 85.12     | 0.00       | 0.00       | 98.71      | 86.23       |
| 12   | 1.8    | 0.000575 | 0       | 0.021933 | 0      | 0      | 0.00        | 78.16     | 0.00       | 0.00       | 97.46      | 80.19       |
